# Supplementary material
Source: publisher figshare collection journal article supplement (https://karger.figshare.com/ndownloader/files/14568950)
Supplement: Supplementary file 1 [file 14568950]

Supplementary Table 1. Alternative diagnoses of ineligible referrals

| Diagnosis | Number (n=10) |
| --- | --- |
| Unknown, not consistent with prion disease | 5 (50%) |
| Stroke | 1 (10%) |
| Wernicke’s encephalopathy | 1 (10%) |
| Autoimmune encephalopathy | 1 (10%) |
| Post-operative delirium | 1 (10%) |
| Vascular dementia | 1 (10%) |
